# 1 **Overcoming Resistance to BRAF<sup>V600E</sup> Inhibition in Melanoma by Deciphering and** 2 **Targeting Personalized Protein Network Alterations**

3 S. Vasudevan<sup>#</sup>, E. Flashner-Abramson<sup>#</sup>, I. Adesoji Adejumobi, D. Vilencki, S. Stefansky, A.M.

4 Rubinstein and N. Kravchenko-Balasha\*

5 Department for Bio-medical Research, Faculty of Dental Medicine, Hebrew University of Jerusalem,  
6 Jerusalem 91120, Israel

7 \*Corresponding author: [natalyk@ekmd.huji.ac.il](mailto:natalyk@ekmd.huji.ac.il)

8 <sup>#</sup> Equal contribution

## 9 **Keywords**

10 Melanoma; information theory; surprisal analysis; patient-specific altered signaling signatures;  
11 personalized therapy; BRAF<sup>V600E</sup>-mutated melanoma

12

## 13 **Abstract**

14 BRAF<sup>V600E</sup> melanoma patients, despite initially responding to the clinically prescribed anti-BRAF<sup>V600E</sup>  
15 therapy, often relapse and their tumors develop drug resistance. While it is widely accepted that these  
16 tumors are originally driven by the BRAF<sup>V600E</sup> mutation, they often eventually diverge and become  
17 supported by various signaling networks. Therefore, patient-specific altered signaling signatures should be  
18 deciphered and treated individually.

19 In this study, we design individualized melanoma combination treatments based on personalized network  
20 alterations. Using an information-theoretic approach, we compute high-resolution patient-specific altered  
21 signaling signatures. These altered signaling signatures each consist of several co-expressed subnetworks,  
22 which should all be targeted to optimally inhibit the entire altered signaling flux. Based on these data, we  
23 design smart, personalized drug combinations, often consisting of FDA-approved drugs. We validate our  
24 approach in vitro and in vivo showing that individualized drug combinations that are rationally based on  
25 patient-specific altered signaling signatures are more efficient than the clinically used anti-BRAF<sup>V600E</sup> or

26 BRAF<sup>V600E</sup>/MEK targeted therapy. Furthermore, these drug combinations are highly selective, as a drug  
27 combination efficient for one BRAF<sup>V600E</sup> tumor is significantly less efficient for another, and vice versa.  
28 The approach presented herein can be broadly applicable to aid clinicians to rationally design patient-  
29 specific anti-melanoma drug combinations.

30

## 31 **Introduction**

32 The rates of melanoma have been rapidly increasing [1]. Melanoma is one of the most common cancers in  
33 young adults, and the risk for melanoma increases with age [1]. However, alongside the rapid increase in  
34 incidence, there has also been rapid clinical advancement over the past decade, with targeted therapy and  
35 immunotherapy that have become available to melanoma patients [2].

36 Melanoma is associated with a great burden of somatic genetic alterations [3], with the primary actionable  
37 genomic data being an activating mutation in the BRAF gene, BRAF<sup>V600E</sup>, occurring in ~50% of all  
38 melanomas [3,4].

39 Nearly a dozen new treatments have been approved by the Food and Drug Administration (FDA) for  
40 unresectable or metastatic melanoma harboring the BRAF<sup>V600E</sup> mutation, among them vemurafenib (a  
41 BRAF<sup>V600E</sup> inhibitor), cobimetinib (a MEK<sup>MAPK</sup> inhibitor), or a combination of dabrafenib and trametinib  
42 (a BRAF<sup>V600E</sup> inhibitor and a MEK<sup>MAPK</sup> inhibitor, respectively) [2].

43 While targeted therapy revolutionized melanoma treatment, the high hopes shortly met a disappointment,  
44 as it became evident that most patients treated with BRAF<sup>V600E</sup> inhibitors eventually relapse and their  
45 tumors become resistant to the treatment [5–7]. Various combination treatments were suggested to  
46 overcome the acquired resistance to BRAF<sup>V600E</sup> inhibitors [5,6,9,10]. Nevertheless, BRAF<sup>V600E</sup> and MEK  
47 inhibitors remain the only targeted agents approved by the FDA for melanoma.

48 In this study, we design patient-specific targeted treatments for melanoma based on individualized  
49 alterations in signaling protein networks, rather than on genomic or protein biomarkers. Attempting to  
50 treat patients based on the identification of single biomarkers or signaling pathways may overlook tumor-

51 specific molecular alterations that have evolved during the course of disease, and the consequently  
52 selected therapeutic regimen may lack long term efficacy resulting from partial targeting of the tumor  
53 imbalance. We have shown that different patients may display similar oncogene expression levels, albeit  
54 carrying biologically distinct tumors that harbor different sets of unbalanced molecular processes [11].  
55 Therefore, we suggest to explore the cancer data space utilizing an information theoretic approach that is  
56 based on surprisal analysis [11–13], to unbiasedly identify the altered signaling network structure that has  
57 emerged in every single tumor [11,12].  
58 Our thermodynamic-like viewpoint grasps that tumors are altered biological entities, which deviate from  
59 their steady state due to patient-specific alterations. Those alterations can manifest in various manners  
60 that are dependent on environmental or genomic cues (e.g. carcinogens, altered cell-cell communication,  
61 mutations, etc.) and give rise to one or more distinct groups of co-expressed onco-proteins in each tumor,  
62 named unbalanced processes [11–13]. A patient-specific set of unbalanced processes constitutes a unique  
63 signaling signature and provides critical information regarding the elements in this signature that should  
64 be targeted. Each tumor can harbor several distinct unbalanced processes, and therefore all of them should  
65 be targeted in order to collapse the altered signaling flux in the tumor [11,12]. We have demonstrated that  
66 with comprehensive knowledge about the patient-specific altered signaling signature (PaSSS) in hand, we  
67 can predict highly efficacious personalized combinations of targeted drugs in breast cancer [12].  
68 Herein, we decipher the accurate network structure of co-expressed functional proteins in melanoma  
69 tumors, hypothesizing that the PaSSS identified will guide us on how to improve the clinically used  
70 BRAF<sup>V600E</sup>-targeted drug combinations. Our aim was to examine the ability of PaSSS-based drug  
71 combinations to reduce the development of drug resistance, which frequently develops following  
72 BRAF<sup>V600E</sup> inhibition in melanoma.  
73 To this end, we studied a dataset consisting of 353 BRAF<sup>V600E</sup> and BRAF<sup>WT</sup> skin cutaneous melanoma  
74 (SKCM) samples, aiming to gain insights into the altered signaling signatures that have emerged in these  
75 tumors. A set of 372 thyroid carcinoma (THCA) samples was added to the dataset, as these tumors

76 frequently harbor BRAF<sup>V600E</sup> as well, therefore enabling studying the commonalities and differences  
77 between tumor types that frequently acquire the BRAF<sup>V600E</sup> mutation.  
78 We show that 17 distinct unbalanced processes are repetitive among the 725 SKCM and THCA patient-  
79 derived cancer tissues. Each tumor is characterized by a specific subset of typically 1-3 unbalanced  
80 processes. Interestingly, we demonstrate that the PaSSS does not necessarily correlate with the existence  
81 of the BRAF<sup>V600E</sup>, namely different tumors can harbor different signatures while both carrying the  
82 mutated BRAF, and vice versa – tumors can harbor the same altered signaling signature regardless of  
83 whether they carry BRAF<sup>V600E</sup> or BRAF<sup>WT</sup>. These data suggest that examination of the BRAF gene alone  
84 does not suffice to tailor effective medicine to the patient. SKCM and THCA patients harboring  
85 BRAF<sup>V600E</sup> can respond differently to the same therapeutic regimen, or rather benefit from the same  
86 treatment even though their BRAF mutation status differs.  
87 We experimentally demonstrate our ability to predict effective personalized therapy by analyzing a cell  
88 line dataset and tailoring efficacious personalized combination treatments to two BRAF<sup>V600E</sup>-harboring  
89 melanoma cell lines, A375 and G361. The predicted PaSSS-based drug combinations were shown to have  
90 an efficacy superior to monotherapies or other drug combinations (such that were not predicted to target  
91 the individualized altered signaling signatures, and combinations used in clinics), both *in vitro* and *in*  
92 *vivo*. We show that an in depth resolution of individualized signaling signatures allows inhibiting the  
93 development of drug resistance and melanoma regrowth, by demonstrating that while A375 and G361  
94 melanomas develop drug resistance several weeks following initial administration of the clinically used  
95 combination, dabrafenib+trametinib, individualized PaSSS-based drug combinations gain a longer lasting  
96 effect and show high selectivity.

97

## 98 **Methods**

### 99 ***Datasets.***

100 This study utilized a protein expression dataset consisting of 353 skin cutaneous melanoma (SKCM)  
101 sample and 372 thyroid carcinoma (THCA) samples. The samples were selected from a large TCPA  
102 dataset containing 7694 cancer tissues from various anatomical origins (PANCAN32, level 4 [14]). Each  
103 cancer tissue was profiled on a reverse phase protein array (RPPA) for 258 cancer-associated proteins.  
104 After filtering out proteins that had NA values for a significant number of patients, 216 proteins remained  
105 for further analysis.  
106 The dataset for the cancer cell lines was downloaded from the TCPA portal [14]. The data was already  
107 published by Li et al. [15]. A part of the original dataset containing 290 cell lines from 16 types of cancers  
108 was selected, including breast, melanoma, ovarian, brain, blood, lung, colon, head and neck, kidney, liver,  
109 pancreas, bone and different types of sarcomas, stomach-oesophagus, uterus and thyroid cancers. The  
110 cell lines in the dataset were profiled for 224 phospho-proteins and total proteins using RPPA.

### 111 *Surprisal analysis*

112 Surprisal analysis is a thermodynamic-based information-theoretic approach [16–18]. The analysis is  
113 based on the premise that biological systems reach a balanced state when the system is free of constraints  
114 [19–21]. However, when under the influence of environmental and genomic constraints, the system is  
115 prevented from reaching the state of minimal free energy, and instead reaches a state which is higher in  
116 free energy (in biological systems, which are normally under constant temperature and constant pressure,  
117 minimal free energy equals maximal entropy).

118 Surprisal analysis can take as input the expression levels of various macromolecules, e.g. genes,  
119 transcripts, or proteins. However, be it environmental or genomic alterations, it is the proteins that  
120 constitute the functional output in living systems, therefore we base our analysis on proteomic data. The  
121 varying forces, or constraints, that act upon living cells ultimately manifest as alterations in the cellular  
122 protein network. Each constraint induces a change in a specific part of the protein network in the cells.  
123 The subnetwork that is altered due to the specific constraint is termed an unbalanced process. System can  
124 be influenced by several constraints thus leading to the emergence of several unbalanced processes. When

125 tumor systems are characterized, the specific set of unbalanced processes is what constitutes the tumor-  
126 specific signaling signature.

127 Surprisal analysis discovers the complete set of constraints operating on the system in any given tumor,  $k$ ,  
128 by utilizing the following equation [22]:  $\ln X_i(k) = \ln X_i^0(k) - \sum G_{ia}\lambda_\alpha(k)$ , where  $i$  is the protein of interest,  
129  $X_i^0$  is the expected expression level of the protein when the system is at the steady state and free of  
130 constraints, and  $\sum G_{ia}\lambda_\alpha(k)$  represents the sum of deviations in expression level of the protein  $i$  due to the  
131 various constraints, or unbalanced processes, that exist in the tumor  $k$ .

132 The term  $G_{ia}$  denotes the degree of participation of the protein  $i$  in the unbalanced process  $\alpha$ , and its sign  
133 indicates the correlation or anti-correlation between proteins in the same process (**Table S1**). Proteins  
134 with significant  $G_{ia}$  values are grouped into unbalanced processes (**Fig. S1, Table S2**) that are active in  
135 the dataset [12].

136 The term  $\lambda_\alpha(k)$  represents the importance of the unbalanced process  $\alpha$  in the tumor  $k$  (**Table S1**).

137 The partial deviations in expression level of the protein  $i$  due to the different constraints sum up to the  
138 total change in expression level (relative to the balance state level),  $\sum G_{ia}\lambda_\alpha(k)$ .

139 For complete details regarding the analysis please refer to the SI of reference 12.

#### 140 ***Determination of the number of significant unbalanced processes.***

141 The analysis of the 725 patients provided a 725x216 matrix of  $\lambda_\alpha(k)$  values, such that every row in the  
142 matrix contained 216 values of  $\lambda_\alpha(k)$  for 725 patients, and each row corresponded to an unbalanced  
143 process (**Table S1**). However, not all unbalanced processes are significant. Our goal is to determine how  
144 many unbalanced processes are needed to reconstruct the experimental data, i.e. for which value of  $n$ :  $\ln$   
145  $(X_i(k)/M) \approx - \sum G_{ia}\lambda_\alpha(k)$ . To find  $n$ , we performed the following two steps:

146 (1) **Reproduction of the experimental data by the unbalanced processes was verified**: We plotted  
147  $\sum G_{ia}\lambda_\alpha(k)$  for  $\alpha = 1, 2, \dots, n$  against  $\ln X_i(k)$  for different proteins,  $i$ , and for different values of  $n$ , and  
148 examined the correlation between them as  $n$  was increased. An unbalanced process,  $\alpha = n$ , was

149 considered significant if it improved the correlation significantly relative to  $\alpha = n - 1$  (**Fig. S2**)

150 (see [11] for more details).

151 **(2) Processes with significant amplitudes were selected**: To calculate threshold limits for  $\lambda_\alpha(k)$  values  
152 (presented in **Table S1** and **Fig. S3**) the standard deviations of the levels of the 10 most stable proteins in  
153 this dataset were calculated (e.g. those with the smallest standard deviations values). Those fluctuations  
154 were considered as baseline fluctuations in the population of the patients which are not influenced by the  
155 unbalanced processes. Using standard deviation values of these proteins the threshold limits were  
156 calculated as described previously [23]. The analysis revealed that from  $\alpha = 18$ , the importance values,  
157  $\lambda_\alpha(k)$ , become insignificant (i.e. do not exceed the noise threshold), suggesting that 17 unbalanced  
158 processes are enough to describe the system.

159 For more details see references 12 and 22.

### 160 ***Generation of functional subnetworks.***

161 The functional sub-networks presented in Figures 2, 5, 6, S1 and S4 were generated using a python script  
162 as described previously [12]. Briefly, the goal was to generate a functional network according to STRING  
163 database, where proteins with negative G values are marked blue and proteins with positive G values are  
164 marked red, to easily identify the correlations and anti-correlations between the proteins in the network.  
165 The script takes as an input the names of the genes in the network and their G values, obtains the  
166 functional connections and their weights from STRING database (string-db.org), and then plots the  
167 functional network (using matplotlib library).

### 168 ***Barcode calculation.***

169 The barcodes of unbalanced processes were generated using a python script. For each patient,  $\lambda_\alpha(k)$  ( $\alpha = 1,$   
170  $2, 3, \dots, 17$ ) values were normalized as follows: If  $\lambda_\alpha(k) > 2$  (and is therefore significant according to  
171 calculation of threshold values) then it was normalized to 1; if  $\lambda_\alpha(k) < -2$  (significant according to  
172 threshold values as well) then it was normalized to -1; and if  $-2 < \lambda_\alpha(k) < 2$  then it was normalized to 0.

173 ***Cell Culture.***

174 The BRAF mutated melanoma cell lines, A375 and G361, were obtained from the ATCC and grown in  
175 DMEM (G361) or RPMI (A375) medium. The cells were supplemented with 10 % fetal calf serum  
176 (FCS), L-glutamine (2mM), 100 U/ml penicillin and 100 mg/ml streptomycin and incubated at 37 °C in  
177 5% CO<sub>2</sub>. The cell lines were authenticated at the Biomedical Core Facility of the Technion, Haifa, Israel.

178 ***Western blot analysis.***

179 The cells were seeded into 6 well plates (~1.5 x 10<sup>6</sup> cells/well) and grown under complete growth media.  
180 A375 cells were treated the next day as indicated for 48 hours in partial starvation medium (RPMI  
181 medium with 1.2% FCS). G361 cells were treated in complete growth medium for 24 hours. The dead  
182 cells were collected from the medium. The adherent cells were then treated with IGF for 15 minutes. The  
183 cells were then lysed using hot sample buffer (10% glycerol, 50 mmol/L Tris-HCl pH 6.8, 2% SDS, and  
184 5% 2-mercaptoethanol) and western blot analysis was carried out. The lysates were fractionated by SDS-  
185 PAGE and transferred to nitrocellulose membranes using a transfer apparatus according to the  
186 manufacturer's protocols (Bio-Rad). Blots were developed with an ECL system according to the  
187 manufacturer's protocols (Bio-Rad).

188 ***Methylene blue assay.***

189 In a 96 well plate, the cells were seeded and treated as indicated for 72 hours. The cells were fixed with  
190 4% paraformaldehyde and then stained with methylene blue. To calculate the number of surviving cells,  
191 the color was extracted by adding 0.1M Hydrochloric acid and the absorbance was read at 630 nm.

192 ***MTT assay.***

193 Cells were seeded and treated as indicated in a 96 well plate for 72 hours. Cell viability was checked  
194 using MTT assay kit (Abcam). Equal volumes of MTT solution and culture media were added to each  
195 well and incubated for 3 hours at 37 °C. MTT solvent was added to each well, and then the plate was



196 covered in aluminum foil and put on the orbital shaker for 15 minutes. Absorbance was read at 590nm  
197 following 1 hour.

### 198 ***Resistance Assay.***

199 Cells were seeded in multiple 96 well plates and treated as needed in various time points (3, 7, 14, 21, 28,  
200 35, 42, 49, 54 days). At every time point the cells were fixed with 4% paraformaldehyde and then stained  
201 with methylene blue. The number of cells which survived at each time point was quantified by adding  
202 0.1M Hydrochloric acid and reading the absorbance at 630 nm.

203

### 204 ***Animal Studies.***

205 The cells - A375 ( $0.25 \times 10^6$  cells/mouse) or G361 ( $0.5 \times 10^6$  cells/ mouse ) - were inoculated  
206 subcutaneously into NSG mice (n = 8 mice per group), and once the volume of the tumors reached 50  
207 mm<sup>3</sup>, treatments were initiated 6 times a week for up to 4 weeks. Tumor volume was measured twice a  
208 week. Trametinib (0.5mg/kg), dasatinib (35mg/kg) and dabrafenib (35mg/kg) were suspended in an  
209 aqueous mixture of 0.5% hydroxypropyl methylcellulose + 0.2% tween 80 and administered by oral  
210 gavage. 2-deoxy-D-glucose (500mg/kg) was suspended in saline and injected intraperitoneally. All the  
211 drugs were purchased from Cayman chemicals (Enco, Israel). The Hebrew University is an AAALAC  
212 International accredited institute. All experiments were conducted with approval from the Hebrew  
213 University Animal Care and Use Committee. Ethical accreditation number: Md-17-15174-4.

214

## 215 **Results**

### 216 ***An overview of the experimental-computational approach***

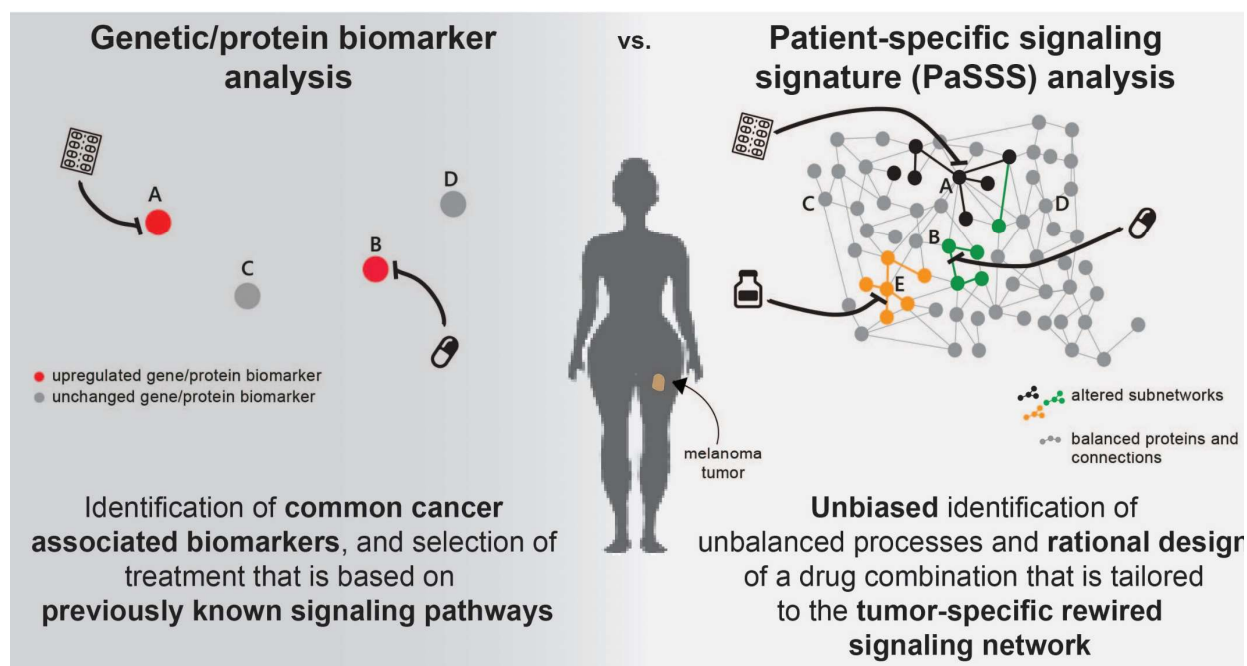

**Figure 1: Conventional biomarker analysis vs. patient-specific signaling signature analysis.** Genetic/protein biomarker analysis relies on evaluation of the expression levels of common cancer type-associated genes or proteins (left). The design of a drug combination is done according to inference of the state of the surrounding signaling network, based on previous knowledge (left). In contrast, patient-specific signaling signature (PaSSS) analysis involves proteomic analysis of hundreds of cancer-associated proteins, and unbiased identification of the altered signaling signature in every sample, i.e. that does not depend on previous knowledge of signaling pathways. This enables rationally designing personalized combinations of targeted drugs that are based on the patient-specific uniquely rewired signaling network (right).

217 Biomarker analysis in melanoma relies mainly on the identification of mutations in the BRAF gene [24].  
218 If mutation/upregulation of the mutant BRAF<sup>V600E</sup> is identified (**Fig. 1**, left), the patient will likely be  
219 treated with a BRAF<sup>V600E</sup> inhibitor (e.g. vemurafenib [25] or dabrafenib [26]), possibly concurrently with  
220 an inhibitor of MEK<sup>MAPK</sup> (e.g. trametinib [27]). The combination of BRAF<sup>V600E</sup> and MEK<sup>MAPK</sup> inhibitors  
221 was shown to be superior to BRAF<sup>V600E</sup> inhibition alone and to delay or prevent the development of drug  
222 resistance [9].  
223 However, the biomarker analysis utilized in clinics lacks information about the altered signaling network,  
224 and, for example, may overlook additional or alternative protein targets that, if targeted by drugs, may  
225 enhance the efficacy of the treatment (**Fig. 1**, left).

226 We utilize an information theoretic approach that is based on surprisal analysis (**Methods**) [11–13] to  
227 gain information regarding the patient-specific signaling signature (PaSSS) that has emerged in every  
228 individual tumor (**Fig. 1**, right). Based on proteomic analysis of the samples, we identify the set of altered  
229 protein-protein co-expressed subnetworks, or *unbalanced signaling processes*, that has arisen as a result  
230 of constraints (environmental or genomic) which operate on the tumor, and then design a combination of  
231 targeted drugs that is expected to collapse the tumor-specific altered signaling signature (**Fig 1**, right and  
232 **Methods**) [11–13].

233 We obtained from the TCPA database [14] a dataset containing 353 skin cutaneous melanoma (SKCM)  
234 and 372 thyroid cancer (THCA) samples (725 samples in total). The thyroid cancer samples were added  
235 to the dataset for two main reasons: (1) to increase the number of samples in the dataset, thereby  
236 increasing the resolution of the analysis; (2) THCA tumors frequently harbor the BRAF<sup>V600E</sup> mutation,  
237 and we were therefore interested in examining the commonalities and differences between the altered  
238 signaling signatures that emerged in SKCM and THCA tumors.

### 239 *17 unbalanced processes repeat themselves throughout 725 SKCM and THCA tumors*

240 The analysis of the dataset revealed that the 725 SKCM and THCA tumors can be described by 17  
241 unbalanced processes (**Fig. S1**; the amplitudes for each process in each patient and the importance of each  
242 protein in the different processes can be found in **Table S1**; the protein composition of each process is  
243 presented in **Table S2**), i.e. 17 distinct unbalanced processes suffice to reproduce the experimental data  
244 (**Fig. S2** and **Methods**).

245 Unbalanced processes 1 and 2, the two most significant unbalanced processes, which appear in the largest  
246 number of tumors, distinguish well between SKCM and THCA tumors, as can be seen by the 2D plots of  
247  $\lambda_{\alpha}(k)$  values (i.e. amplitudes of each process in every tumor; **Fig. 2A,C,E**). Unbalanced process 1 appears  
248 almost exclusively in THCA tumors (372 THCA tumors harbor unbalanced process 1, vs. 46 SKCM  
249 tumors; **Fig. 2A,E**, **Table S2**), while unbalanced process 2 characterizes almost exclusively SKCM

250 tumors (331 SKCM tumors harbor unbalanced process 2, vs. only 4 THCA tumors; **Fig. 2C,E, Table S2**).

251 Unbalanced process 1 involves upregulation of proteins that have been previously linked to THCA:

252 LKB1 [28], fibronectin [29,30], Bcl-2 [31], claudin 7 [32] (**Fig. 2B**). Unbalanced process 2 is

253 characterized by the upregulation of proteins that have been implicated in melanoma, such as Stat5 $\alpha$  [33],

254 Akt [34], cKit [35], Her3 [36], and ATM [37] (**Fig. 2D**). As can be seen in the graph in Figure 2C,

255 unbalanced process 2 was assigned a positive amplitude in all 331 SKCM tumors in which it appears,

256 while in 4 THCA tumors it was assigned a negative amplitude (see also **Table S2**). This means that the

257 proteins that participate in this unbalanced process deviate to opposite directions in the two types of

258 tumors (importantly, this remark denotes only the partial deviation that occurred in these proteins due to

259 unbalanced process 2; some of these proteins may have undergone additional deviations due to the

260 activity of other unbalanced processes. See **Table S2** and **Methods**). Although this dominant process

261 appears in a significant number of BRAF<sup>V600E</sup> SKCM patients (**Fig. 2C**), it does not include

262 pS(445)BRAF and downstream signaling. This finding corresponds to a recent characterization of

263 melanoma tissues [4] and suggests that the signaling signatures of BRAF<sup>V600E</sup> tissues may diverge over

264 time and acquire additional signaling routes which are not necessarily related to the original driver

265 mutations, such as BRAF<sup>V600E</sup> or its downstream MEK<sup>MAPK</sup> signaling.

266 Unbalanced process 2 can also be found in BRAF<sup>WT</sup> patients (**Fig. 2C**). See, for example, patient TCGA-

267 XV-AAZV (**Fig. 3**). The signature of this patient did not include additional processes. A total of 181

268 SKCM patients harbor this signaling signature, consisting only of unbalanced process 2: 100 of them

269 harbor BRAF<sup>WT</sup> and 81 of them harbor BRAF<sup>V600E</sup> (**Fig. 3**). In contrast, no THCA patients harbor this

270 signature (**Fig. 3**). The finding that BRAF<sup>WT</sup> and BRAF<sup>V600E</sup> SKCM patients can, in some cases, harbor

271 the same altered signature suggests that these patients can also benefit from the same combination of

272 targeted drugs.

273 Although unbalanced processes 1 and 2 distinguish well between SKCM and THCA patients (**Fig.**

274 **2A,C,E**), these processes alone do not suffice to describe the PaSSS of all patients. Our analysis suggests

275 that to decipher the altered signaling signature in every patient, 17 unbalanced processes should be  
 276 considered. Hence, 2D plots may overlook important therapeutic information. When we inspect the  
 277 patients in the context of a 17-dimensional space, where each dimension represents an unbalanced  
 278 process, we find that not all SKCM patients harbor unbalanced process 2, and that those who

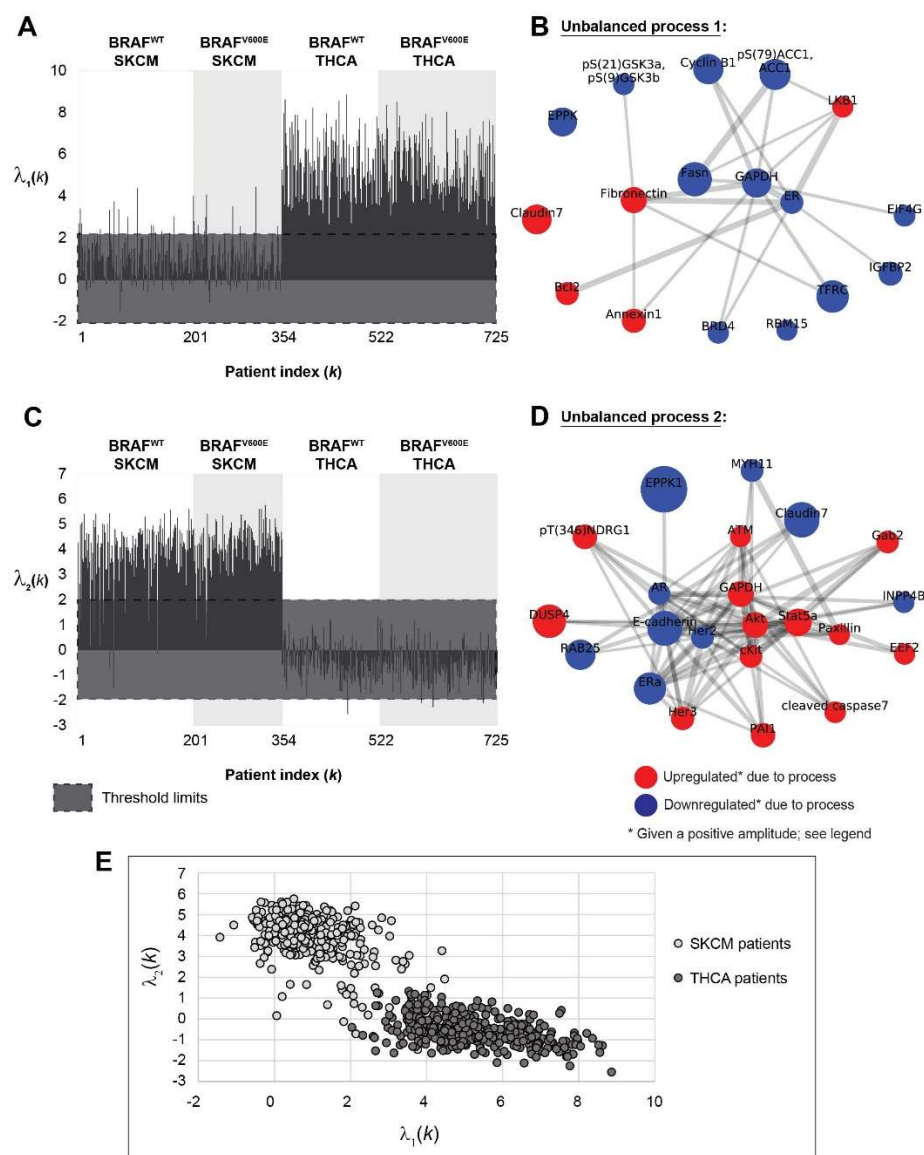

**Figure 2: Unbalanced processes 1 and 2 distinguish well between SKCM and THCA tumors when plotted in 2D.** The majority of THCA tumors harbor unbalanced process 1 (A), while the majority of SKCM tumors harbor unbalanced process 2 (C). Unbalanced processes 1 and 2 are shown in panels B and D. **Note** that red proteins are upregulated, and blue proteins are downregulated given that the amplitude of the process is positive. In tumors where the amplitude is negative, the direction of change is opposite. (E) A 2D plot showing  $\lambda_2(k)$  against  $\lambda_1(k)$  for all SKCM and THCA patients. The plot shows nicely the separation between SKCM and THCA patients in this 2D space. Note, however, that every tumor is characterized by a set of unbalanced

processes (a PaSSS), and that unbalanced processes 1 and 2 alone do not suffice to describe the complete tumor-specific altered signaling signatures.

279 do harbor this process may harbor additional unbalanced processes as well (**Fig. 3** and **Fig. S3**). We have  
280 shown that mapping the patients into a multi-dimensional space, a 17D space in our case, allows  
281 deciphering the set of unbalanced process, namely the PaSSS, in every tumor. This mapping is crucial for  
282 the design of efficacious treatments [12].

283 The SKCM patient TCGA-EB-A5SE, for example, is characterized by a PaSSS consisting of unbalanced  
284 processes 2 and 4 (**Fig. 3**). Only 5 SKCM patients were found to be characterized by this set of  
285 unbalanced processes. Two of the patients harbor BRAF<sup>WT</sup> tumors, and 3 of them BRAF<sup>V600E</sup> (**Fig. 3**).

286 The SKCM patient TCGA-ER-A2NF was found to harbor a PaSSS consisting of unbalanced processes 1,  
287 6 and 10 (**Fig. 3**). This patient harbors a one-of-a-kind tumor, as no other patients in the dataset harbor  
288 this altered signaling signature (**Fig. 3**).

289 The PaSSS of THCA patient TCGA-DJ-A13V includes unbalanced processes 1 and 4 (**Fig. 3**). This  
290 signature characterizes 38 THCA patients, 12 of them BRAF<sup>WT</sup> and 26 of them BRAF<sup>V600E</sup> (**Fig. 3**). These  
291 THCA patients may benefit from a combination of drugs that target central protein nodes in unbalanced  
292 processes 1 and 4, regardless of whether they harbor BRAF<sup>V600E</sup> or not. No SKCM patients harbor this  
293 altered signaling signature (**Fig. 3**).

294 Another interesting finding is that SKCM and THCA patients may harbor the same PaSSS, as is the case  
295 of the signature consisting of unbalanced process 1, shared by 3 SKCM patients and 142 THCA patients  
296 (**Fig. 3** and **Table S2**). All these patients may be treated with the same drug combination, targeting key  
297 proteins in unbalanced process 1, e.g. LKB1 and fibronectin (**Fig. 2B**).

|                                                                                                 |                                                                                          |                                                                                          |                                                                                          |                                                                                           |                                                                                          |
|-------------------------------------------------------------------------------------------------|------------------------------------------------------------------------------------------|------------------------------------------------------------------------------------------|------------------------------------------------------------------------------------------|-------------------------------------------------------------------------------------------|------------------------------------------------------------------------------------------|
| <b>Patient index</b>                                                                            | <br>207 | <br>544 | <br>242 | <br>20 | <br>2 |
| <b>Case ID</b>                                                                                  | TCGA-XV-AAZV                                                                             | TCGA-DJ-A13V                                                                             | TCGA-EB-A5SE                                                                             | TCGA-ER-A2NF                                                                              | TCGA-EB-A5UM                                                                             |
| <b>Cancer type</b>                                                                              | SKCM                                                                                     | THCA                                                                                     | SKCM                                                                                     | SKCM                                                                                      | SKCM                                                                                     |
| <b>Active unbalanced processes</b>                                                              | 2 <sup>+</sup>                                                                           | 1 <sup>+</sup> ,4 <sup>+</sup>                                                           | 2 <sup>+</sup> ,4 <sup>+</sup>                                                           | 1 <sup>+</sup> ,6 <sup>+</sup> ,10 <sup>+</sup>                                           | 1 <sup>+</sup>                                                                           |
| <b># of SKCM patients with the same signature (BRAF<sup>V600E-</sup>/BRAF<sup>V600E+</sup>)</b> | <b>181</b><br>(100/81)                                                                   | <b>0</b>                                                                                 | <b>5</b><br>(2/3)                                                                        | <b>1</b><br>(1/0)                                                                         | <b>3</b><br>(3/0)                                                                        |
| <b># of THCA patients with the same signature (BRAF<sup>V600E-</sup>/BRAF<sup>V600E+</sup>)</b> | <b>0</b>                                                                                 | <b>38</b><br>(12/26)                                                                     | <b>0</b>                                                                                 | <b>0</b>                                                                                  | <b>142</b><br>(52/90)                                                                    |

298

299

300

301

**Figure 3: Examples for patient-specific sets of active unbalanced processes.** Each patient typically harbors a set of 1-3 active unbalanced processes. Our results show that a specific *set* of active processes does not necessarily distinguish between BRAF<sup>V600E-</sup> and BRAF<sup>V600E+</sup> patients, or between SKCM and THCA patients.

### 302 *The altered signaling signatures identified in SKCM and THCA are almost mutually exclusive*

303 To explore the entire dataset in terms of the set of unbalanced processes that each patient harbors, we

304 assigned to each patient a patient-specific barcode, denoting the normalized PaSSS, i.e. the active

305 unbalanced processes in the specific tumor, and the signs of their amplitudes (positive/negative)

306 disregarding the size of the amplitude (**Fig. 4, Table S3**). These barcodes represent the mapping of every

307 patient to a 17-dimensional space where each dimension denotes a specific unbalanced process [11,12].

308 We found that 138 distinct barcodes repeated themselves in the dataset (**Table S4**). Interestingly, the

309 barcodes are almost mutually exclusive: 87 of the barcodes characterize SKCM tumors; 84 of them

310 characterize only SKCM tumors and are not harbored by any THCA tumor (**Table S4**). 51 barcodes

311 characterize THCA tumors; of them 48 characterize solely THCA tumors (**Table S4**).

312 Most of the barcodes are rare: 81 barcodes are shared by only 5 SKCM tumors or less; 56 of them

313 describe single, one-of-a-kind SKCM tumors (**Table S4**). 47 barcodes are shared by only 5 THCA tumors

314 or less; 36 of them describe single THCA tumors (**Table S4**). This finding corroborates with our previous

315 studies of signaling signatures in cancer [12], and underscores the need for personalized cancer diagnosis

316 that is not biased by, e.g., the anatomical origin of the tumor.

317 *Patient-specific barcodes guide the rational design of personalized targeted combination therapy*

|                                                       |                                                                                          |                                                                                         |                                                                                          |
|-------------------------------------------------------|------------------------------------------------------------------------------------------|-----------------------------------------------------------------------------------------|------------------------------------------------------------------------------------------|
| <b>Patient index</b>                                  | <br>238 | <br>70 | <br>8 |
| <b>Case ID</b>                                        | TCGA-EE-A3AD                                                                             | TCGA-EE-A180                                                                            | TCGA-EB-A4XL                                                                             |
| <b>Cancer type</b>                                    | SKCM                                                                                     | SKCM                                                                                    | SKCM                                                                                     |
| <b>BRAF status</b>                                    | BRAF <sup>V600E</sup>                                                                    | BRAF <sup>WT</sup>                                                                      | BRAF <sup>WT</sup>                                                                       |
| <b>Disease stage</b>                                  | III                                                                                      | III                                                                                     | IIC                                                                                      |
| <b>Clinical treatment</b>                             | BRAF <sup>V600E</sup> +MEK inhibitors                                                    | immune checkpoint inhibitors                                                            | immune checkpoint inhibitors                                                             |
| <b>SA-identified barcode of unbalanced processes*</b> |        |       |      |
| <b>SA-predicted protein targets**</b>                 | Stat5 $\alpha$ , cKit                                                                    | Stat5 $\alpha$ , cKit, Her2/BRAF, pS(473)Akt                                            | Stat5 $\alpha$ , cKit                                                                    |

\*  Active process - positive amplitude  Active process - negative amplitude  Inactive process

\*\* See the full list of process-specific protein targets in Supplementary Table 5

318

319 **Figure 4:** Patient-specific altered signaling signatures, or barcodes, can guide the design of personalized  
 320 combination therapies. For each tumor, processes with amplitudes exceeding the threshold values (**Methods**) were  
 321 selected and included in patient-specific sets of unbalanced processes. Those sets were converted into schematic  
 322 barcodes. Central proteins from each process were suggested as potential targets for personalized drug  
 323 combinations.

324 We have previously shown the predictive power of our analysis in determining effective patient-tailored  
 325 combinations of drugs that target key proteins in every unbalanced process [12,13].

326 Utilizing the maps of the unbalanced processes identified in the dataset herein (**Fig. S1**), we predicted  
 327 process-specific protein targets for each process (**Table S5**). Each individual patient is predicted to



328 benefit from a therapy that combines drugs against all the unbalanced processes active in the specific  
329 tumor (**Fig. 4, Table S5**).

330 As mentioned above, SKCM patients can in some cases benefit from the same combination therapy,  
331 regardless of their BRAF mutational status. This is the case for patients TCGA-EE-A3AD (carrying  
332 BRAF<sup>V600E</sup>) and TCGA-EB-A4XL (carrying BRAF<sup>WT</sup>), that were found to harbor tumors characterized by  
333 the same barcode of unbalanced processes, and were therefore predicted to benefit from the same  
334 treatment, where Stat5 $\alpha$  and cKit are targeted simultaneously (**Fig. 4**).

335 Patient TCGA-EE-A180 carries BRAF<sup>WT</sup>, as does patient TCGA-EB-A4XL (**Fig. 4**). However, patient  
336 TCGA-EE-A180 harbors two active unbalanced processes that are not active in the tumor of patient  
337 TCGA-EB-A4XL – processes 3 and 8 (**Fig. 4**). Therefore, the list of proteins that should be targeted in  
338 order to collapse the tumor differs in these patients (**Fig. 4**).

### 339 *A375 and G361 melanoma cell lines harbor distinct altered signaling signatures*

340 To experimentally validate our hypothesis that BRAF<sup>V600E</sup> harboring cells may benefit from drug  
341 combinations that are designed based on the PaSSS identified at the time of diagnosis, we turned to  
342 analyze a different dataset containing 290 cell lines originating from 16 types of cancer, including blood,  
343 bone, breast, colon, skin, uterus, and more (see **Methods**). The cell lines were each profiled for the  
344 expression levels of 224 proteins and phosphoproteins using reverse phase protein assay.

345 PaSSS analysis of this cell line dataset revealed that 17 unbalanced processes were repetitive in the 291  
346 cell lines (**Table S6, Table S7, Fig. S4**).

347 We selected two melanoma cell lines for experimental validation, G361 and A375. Both cell lines harbor  
348 the mutated BRAF<sup>V600E</sup>. In the clinic, patients bearing tumors with BRAF<sup>V600E</sup> would all be treated  
349 similarly, with BRAF inhibitors alone or in combination with MEK inhibitors [9,27].

350 Our analysis, however, shows that G361 and A375 each harbor a distinct PaSSS (**Fig. 5,6**). G361 was  
351 found to harbor a PaSSS consisting of unbalanced processes 1 and 6 (**Fig. 5A**). The PaSSS of A375, on

352 the other hand, consisted of three unbalanced processes, 1, 3 and 6 (**Fig. 6A**). The full lists of proteins  
353 participating in these processes are presented in Table S7, and images of the complete unbalanced  
354 processes can be found in Figure S4.

355 To predict cell line-specific drug combinations, central protein targets were selected from each active  
356 unbalanced process. In unbalanced process 6, pMEK1/2, GAPDH and PKM2 represent central  
357 upregulated proteins (**Fig. 5B, Fig. 6B**). Unbalanced process 3 was characterized by an upregulation of  
358 PDGFR $\beta$  (**Fig. 6B**), and unbalanced process 1 involved an upregulation of pS6 (**Fig. 5B, Fig. 6B**). We  
359 hypothesized that targeting these central proteins will reduce the signaling imbalance in A375 and G361  
360 cell lines. Therefore, we predicted that G361 cells will be effectively treated by a drug combination  
361 containing trametinib (a pMEK1/2 inhibitor, commonly used for melanoma in clinics; also inhibits pS6  
362 [38,39]) and 2-deoxy-D-glucose (2-DG; a glycolysis inhibitor, therefore affecting GAPDH and PKM2  
363 levels; **Fig. 5B**). Based on the PaSSS of G361, trametinib should effectively target both unbalanced  
364 processes, 1 and 6 (**Fig. 5B**). However, since unbalanced process 6 was assigned a relatively high  
365 amplitude in G361 cells (**Table S6**), we predicted that a combination treatment combining trametinib with  
366 2DG, which targets additional nodes in unbalanced process 6 (**Fig. 5B**), will more effectively target the  
367 PaSSS in G361 cells.

368 For A375, the amplitude of unbalanced process 6 was ~2-fold lower than in G361 cells, and therefore we  
369 assumed that trametinib alone should suffice to efficiently reduce the signaling flux through this process.  
370 Thus, we predicted that a combination of trametinib and dasatinib (a multi-kinase inhibitor targeting also  
371 PDGFR $\beta$ ) should effectively target the 3 unbalanced processes that constitute the PaSSS of these cells  
372 (**Fig. 6B**).

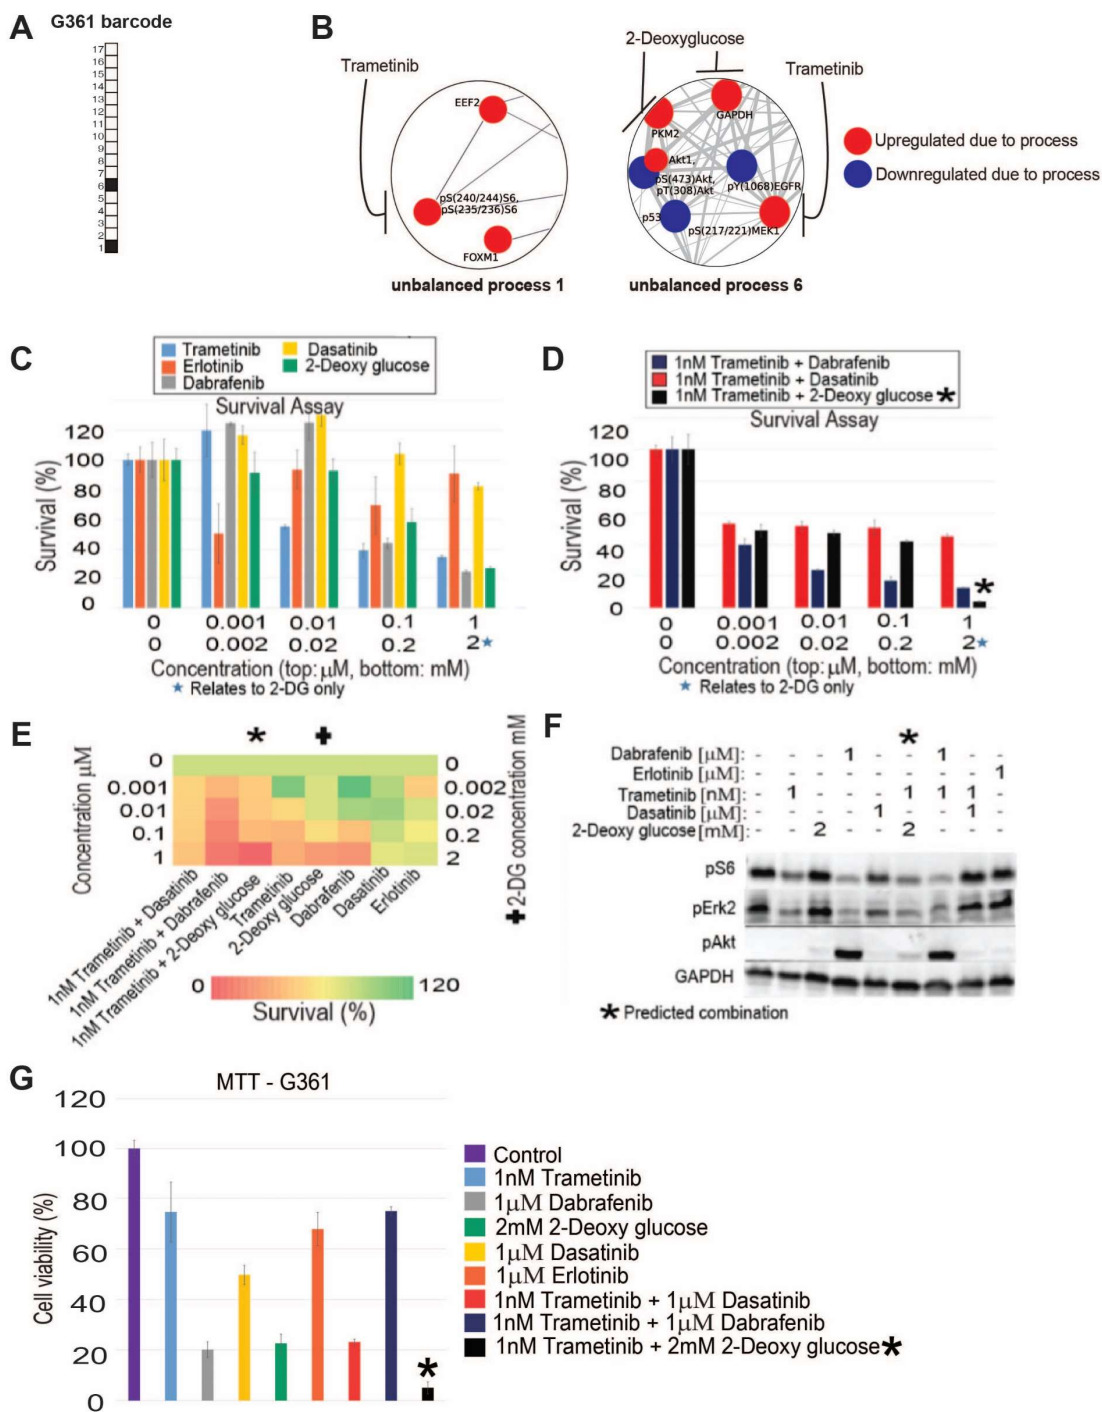

**Figure 5: G361 melanoma cells altered signaling signature and treatment.** (A) Barcode of active unbalanced processes for G361 based on PaSSS analysis. (B) Zoom in images of the active unbalanced processes, 1 and 6, in G361 cells, as well as the drugs targeting the central proteins in each unbalanced process. The upregulated proteins are colored red and the down regulated proteins are colored blue. (C, D) Survival rates of cells in response to different therapies. The cells were treated with the predicted combination (\*) to target G361, the treatments used in the clinics for BRAF mutated melanoma malignancies, monotherapies of each treatment and the predicted combination used to target BRAF mutated melanoma cell

line A375. The combination predicted to target G361 was more efficient than any other treatment. (E) Results of the survival assay (shown in panels A and B) are shown as a heatmap. (F) Western blot results after treatment with different therapies. The predicted combination depletes the signaling in G361 cells as represented by decrease in phosphorylation levels of pS6, pERK and pAkt. Akt remains active when the cells are treated with dabrafenib or dabrafenib + trametinib. (G) G361 cells were treated as indicated for 72 hours and then the viability of the cells was measured in an MTT assay. The effect of the predicted combination (marked in the with an asterix sign) was superior to combinations and single drugs expected to partially inhibit the cell line-specific altered signaling signature.

### 373 *The predicted drug combinations are cell line-specific and highly efficacious*

374 Trametinib and dabrafenib, two clinically used drugs, indeed demonstrated relatively efficient killing of  
375 G361 cells, achieving up to ~55% and ~75% killing, respectively, when administered to the cells as  
376 monotherapies in a range of concentrations between 1 nM and 1  $\mu$ M (**Fig. 5C**). Based on our analysis, we  
377 predicted that these drugs would each partially target the PaSSS in G361 cells (**Fig. 5A,B**).

378 Monotherapies of erlotinib and dasatinib were used as negative controls, as both were not expected to  
379 target the altered signaling signature of G361 cells (**Fig. 5C,D**). Indeed, both drugs demonstrated a weak  
380 effect on G361 cells, reaching up to ~10% and ~20% killing, respectively (**Fig. 5C,E**). 2-DG, which was  
381 predicted to target one of the unbalanced processes active in G361 cells, killed up to ~70% of the cells at  
382 2 mM (**Fig. 5C,E**).

383 When we tested combinations of drugs, we found that when G361 cells were treated with a combination  
384 of trametinib and dabrafenib, the clinically used combined treatment for BRAF<sup>V600E</sup> melanoma, the  
385 combination was superior to each drug administered alone, and reached ~90% killing of the cells when  
386 both drugs were administered at 1  $\mu$ M (**Fig. 5D,E**). The results of our analysis, however, denoted that  
387 other major signaling nodes were altered in G361 cells, and that their targeting by drugs may be beneficial  
388 in these cells. When we tested the combination of trametinib and 2-DG, predicted by us to more  
389 effectively collapse the PaSSS that emerged in G361 cells, we indeed found that the combination  
390 abolished the cells almost completely when trametinib and 2-DG were added at 1  $\mu$ M and 2mM,  
391 respectively (**Fig. 5D,E**). The combination of trametinib and 2-DG also effectively turned off the cellular  
392 signaling, as represented by the central proteins S6, Akt and ERK, while the other combinations we tested

393 failed to do so (**Fig. 5F**). For example, the clinically used combination, dabrafenib+trametinib, induced  
394 the activity of pS(473)Akt (**Fig. 5F**), possibly reflecting a response of the cells to incomplete inhibition of  
395 the altered signaling flux.

396 In A375 cells, trametinib, dabrafenib and dasatinib killed up to ~80% of the cells, when administered as  
397 single drugs (**Fig. 6C,E**). Erlotinib was used as a negative control, as it was predicted not to target any  
398 major node in the PaSSS of A375 cells, and indeed killed only up to ~15% of the cells (**Fig. 6C,E**). 2-DG,  
399 which was predicted to target one of the three unbalanced processes active in A375 cells (**Fig. 6A,B**),  
400 killed up to ~30% of the cells when administered as monotherapy (**Fig. 6C,E**).

401 The clinically used drug combination, trametinib and dabrafenib, was more effective than each drug  
402 alone, and killed up to 90% of the cells (**Fig. 6D,E**). However, as in the case of G361 cells, we predicted  
403 that the clinically used combination would not be optimal in A375 cells, because another major node,  
404 PDGFR $\beta$ , should be targeted as well in order to effectively collapse the PaSSS in A375 cells (**Fig. 6A,B**).

405 We therefore predicted that a combination of trametinib and dasatinib would efficiently target the altered  
406 signaling flux generated by 3 unbalanced processes in A375 cells (**Fig. 6A,B**). When we tested this  
407 combination, we found that it was highly efficacious and killed up to ~95% of the cells (**Fig. 6D,E**).

408 Moreover, trametinib and dasatinib, when combined, diminished S6 and ERK signaling, and lowered the  
409 levels of pPDGFR $\beta$  (**Fig. 6F**). As we found in the case of G361 cells, the clinically used combination,  
410 trametinib and dabrafenib, invoked an upregulation of pS(473)Akt in A375 cells as well (**Fig. 6F**).

411 We tested the effect of combination predicted for G361 cells, trametinib and 2-DG, on A375 cells, and  
412 found that it was less effective in inhibiting the intra-cellular signaling (**Fig. 6F**) as well as cell survival  
413 than the drug combination predicted for the PaSSS of A375 (**Fig. 6D,E**). We attribute this finding to the  
414 fact the combination of trametinib and 2-DG targets only unbalanced processes 1 and 6, while leaving  
415 unbalanced process 3 untargeted, and therefore a partial effect is achieved by these drugs in A375 cells  
416 (**Fig. 6A,B**).

417

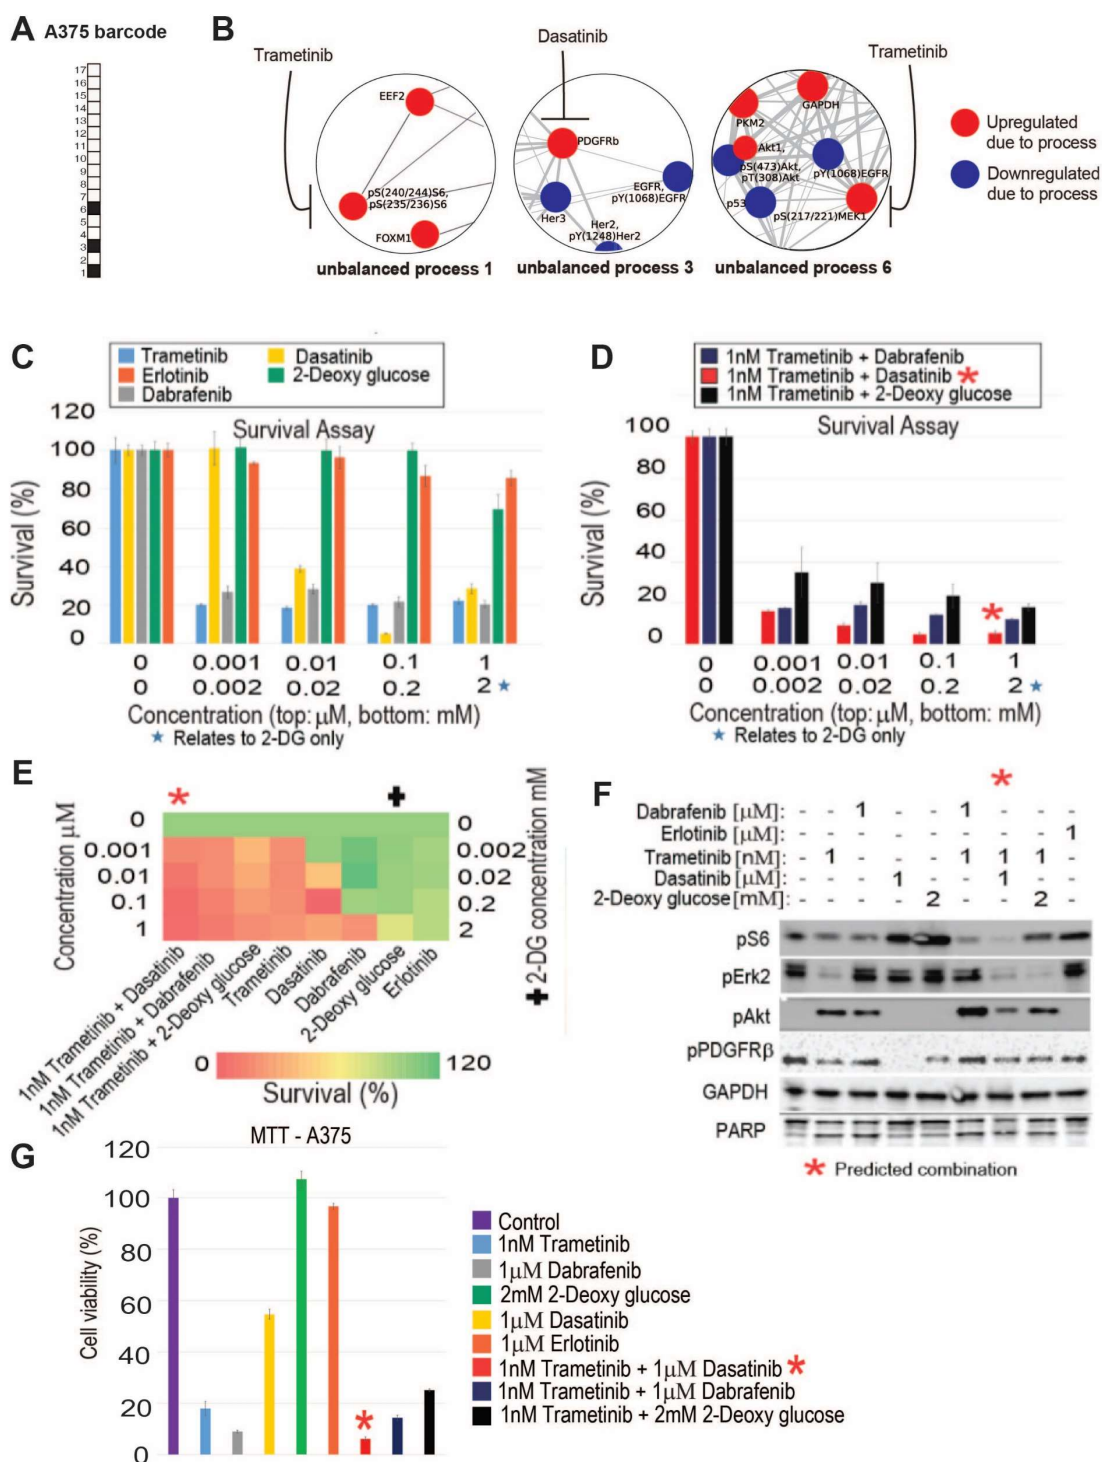

**Figure 6: A375 melanoma cells altered signaling signature and SA-based treatment.** Even though A375 cells harbor BRAF<sup>V600E</sup>, as do G361 cells, they were found to be characterized by a different set of active unbalanced processes, or PaSSS. (A) Barcode of the unbalanced processes for A375 based on PaSSS analysis. (B) Zoom in images of the active unbalanced processes, 1, 3 and 6, in A375 cells, as well as the drugs targeting the central proteins in each unbalanced process. The upregulated proteins are colored red and the down regulated proteins are colored blue. (C, D) Survival rates of cells in response to different therapies.

The cells were treated with the predicted combination (\*) to target A375, the treatments used in the clinics for BRAF mutated melanoma malignancies, monotherapies of each treatment and the predicted combination used to target BRAF mutated melanoma cell line G361. The combination predicted to target A375 was more efficient than any other treatment. (E) Results of the survival assay (shown in panels A and B) are shown as a heatmap. (F) Western blot results after treatment with different therapies. The predicted combination depletes the signaling in A375 cells as represented by decrease in phosphorylation levels of pS6, pERK, pAkt and pPDGFR $\beta$ . Akt remains active when the cells are treated with monotherapies - trametinib or dabrafenib, and the combination therapies - dabrafenib + trametinib or trametinib + 2-deoxy glucose, the predicted combination of G361. (G) A375 cells were treated as indicated for 72 hours and then the viability of the cells was measured in an MTT assay. The effect of the predicted combinations (marked in the figure with asterix signs) was superior to combinations and single drugs expected to partially inhibit the cell line-specific altered signaling signature.

418 When tested in an MTT assay (assessing metabolic activity of the cells), the predicted combinations  
419 demonstrated higher efficacy and selectivity and were superior to other drug combinations or to each  
420 inhibitor alone (Fig. 5G, 6G).

421 *As opposed to common therapies used in clinics, the rationally designed cell line-specific drug*  
422 *combinations prevented the development of drug resistance*

423 We hypothesized that since our predicted drug combinations target the main altered processes  
424 simultaneously, they may delay or prevent the development of drug resistance (Fig. 7A). To test this  
425 hypothesis, G361 and A375 cells were treated twice a week with single inhibitors or with different  
426 combinations of inhibitors, for 4-8 weeks.

427 In G361 cells, 1 nM of trametinib demonstrated little to no effect on the survival of the cells (Fig. 7B). 1  
428  $\mu$ M of dabrafenib killed up to ~92% of the cells at day 21, and then the cells began to regrow, even  
429 though the drug was still administered to the cells twice a week (Fig. 7B). 2 mM of 2-DG killed up to  
430 ~78% of the cells at day 7, and then the cells began to regrow regardless of the presence of the drug (Fig.  
431 7B). Combined treatment with trametinib and dabrafenib, a combination expected to partially target the  
432 altered signaling signature (Fig. 5A,B), effectively killed up to ~96% of the cells at day 21, but then the  
433 cells began to regrow at day 28 in the presence of the drugs (Fig. 7B). However, when the cells were  
434 treated with the G361 PaSSS-based combination, trametinib and 2-DG (Fig. 5A,B), the cells continued to  
435 die until they reached a plateau at day 21, and no regrowth of the cells was evident (Fig. 7B).

436 Similar results were obtained in A375 cells: 1 nM trametinib killed 60% of the cells at day 7, and then the  
437 effect plateaued until the cells began to regrow at day 56 (**Fig. 7C**). 1  $\mu$ M dabrafenib killed ~78% of the  
438 cells at day 3, and then the cells kept growing till they reached 40% survival on day 56 (**Fig. 7C**). 1  $\mu$ M  
439 dasatinib killed ~40% of the cells at day 3, and then the cells regrew to 100% survival (**Fig. 7C**).  
440 Combined treatment with trametinib and dabrafenib achieved 88% killing at day 3, but then the cells grew  
441 until they plateaued at ~30% survival at day 56 (**Fig. 7C**). Trametinib and 2-DG killed 55% of the cells at  
442 day 3 with an increase in effect over time, reaching a plateau of 15% survival at day 42 (**Fig. 7C**). The  
443 A375 PaSSS-based combination, trametinib and dasatinib (**Fig. 6A,B**), demonstrated a significant killing  
444 effect that became stronger with time, reaching near complete killing of the cells at 56 days (**Fig. 7C**).  
445 These results clearly show that the PaSSS-based combinations predicted for each melanoma cell line  
446 prevent cellular regrowth in-vitro. Thus, targeting the actual altered signaling state, identified in the  
447 melanoma cells, and not necessarily the primary driver mutations, can be especially effective in disturbing  
448 the signaling flux and preventing cellular regrowth.



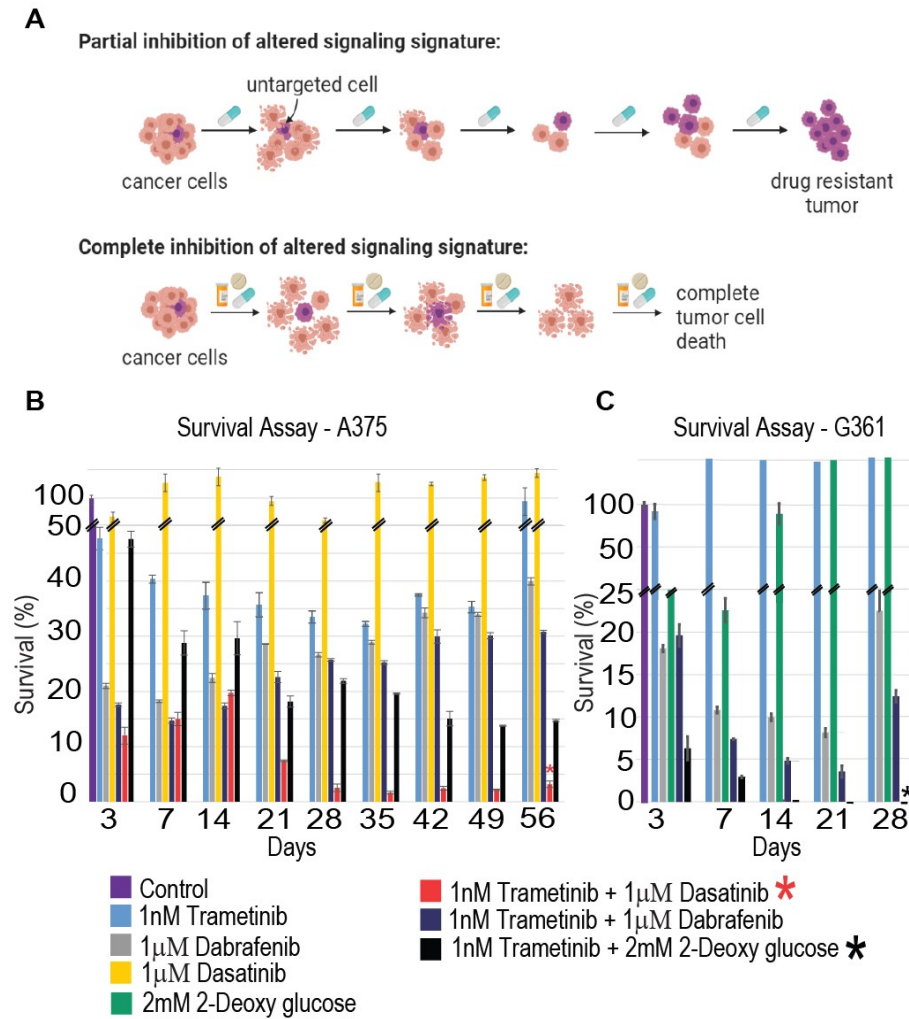

**Figure 7: Development of resistance to different therapies.** (A) The development of resistance to different types of therapies is shown in the illustration. The cells were treated with different therapies twice a week and then checked for cell survival. (B) A375 cells were treated with the monotherapies, trametinib+dasatinib, dabrafenib+trametinib or trametinib+2-deoxyglucose, twice weekly for 56 days. A development of resistance was evident after 21 days, but not in cells treated with trametinib+dasatinib. (C) G361 cells were treated with monotherapies, dabrafenib+trametinib, or trametinib+2-deoxyglucose, twice weekly for 28 days. The cells exhibited signs of drug resistance after 28 days. However, resistance development was not evident in cells that were treated with trametinib+2-deoxyglucose.

449

450 *The predicted drug combinations were superior to clinically used therapies in vivo*

451 We turned to examine the effect of the PaSSS-predicted drug combination in murine models. The cells  
452 (A375 or G361) were injected subcutaneously into NSG mice, and treatments were initiated 6 times a  
453 week for up to 4 weeks (**Fig. 8**).

454 Trametinib alone, or in combination with dasatinib or dabrafenib, was predicted to partially target the  
455 PaSSS of G361 cells (**Fig. 5A,B**). And indeed, these treatments demonstrated a reduction in tumor  
456 growth, relative to vehicle treatment (**Fig. 8A**). However, the PaSSS-based combination, trametinib + 2-  
457 DG, demonstrated the strongest effect, and achieved significant inhibition of G361 tumor growth (**Fig.**  
458 **8A**).

459 A375 tumors that were treated with trametinib alone or with a combination trametinib + 2-deoxyglucose  
460 (predicted to be efficient for G361 but not for A375 cells (**Fig. 5, 6**)) demonstrated slightly reduced  
461 growth relative to vehicle-treated tumors (**Fig. 8B**). When A375 tumors were treated with the clinically  
462 used combination, trametinib + dabrafenib, a stronger effect was observed (**Fig. 8B**). PaSSS analysis  
463 predicted that trametinib + dabrafenib would achieve partial inhibition of the altered signaling in A375  
464 cells (**Fig. 6A,B**), and that adding dasatinib to trametinib should achieve inhibition of intracellular  
465 signaling that have emerged in A375 cells (**Fig. 6A,B**). Indeed, the combination trametinib + dasatinib  
466 demonstrated an effect superior to all other treatments, and significantly inhibited the growth of A375  
467 tumors (**Fig. 8B**).

468 These results point to a significantly higher efficiency of the PaSSS-predicted combinations relative to  
469 drug combinations used in clinics. Moreover, we demonstrated the selectivity of the individualized  
470 treatments. The predicted and very effective combination for one BRAF<sup>V600E</sup> melanoma malignancy was  
471 significantly less effective for the other, and vice versa (**Fig. 8**). Our results underscore the need for a  
472 personalized treatment for each melanoma patient.

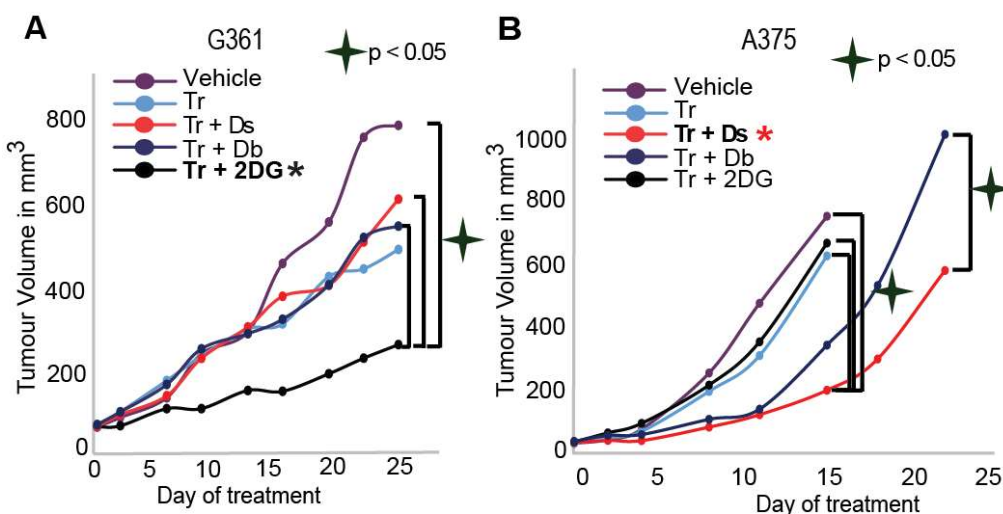

**Figure 8: SA-based drug combinations demonstrated significantly reduced tumor growth *in vivo*.** G361 (A) or A375 (B) were injected subcutaneously into mice, and once tumors reached 50 mm<sup>3</sup>, treatments were initiated. In both cases, the PaSSS-based drug combinations, predicted to target the cell line-specific altered signaling signature, significantly inhibited tumor growth and demonstrated an effect superior to monotherapy of trametinib or to combinations predicted to partially target the PaSSS (see Fig. 5,6 for details regarding the altered signaling signatures and PaSSS-based drug combination predictions).

## 473 Discussion

474 With the accelerated gain of knowledge in the field of melanoma therapy and cancer research, it is  
475 becoming clear that tumors evolving from the same anatomical origins cannot necessarily be treated the  
476 same way [40]. Inter tumor heterogeneity results in various response rates of patients to therapy [41–43].  
477 Herein we extend this notion, and show that even tumors that were initially driven by the same  
478 oncogenes, specifically BRAF<sup>V600E</sup>-driven melanoma tumors, often evolve in different molecular manners  
479 [44], giving rise to distinct altered signaling signatures, or PaSSS (patient-specific altered signaling  
480 signature), at the time of biopsy.

481 We show that 17 altered molecular processes are repetitive among the 725 SKCM and THCA tumors.  
482 Each tumor is characterized by a specific PaSSS, i.e. a subset of ~1-3 unbalanced processes. Accordingly,  
483 each patient is assigned a unique barcode, denoting the normalized PaSSS. We show that the collection of  
484 725 tumors is described by 138 distinct barcodes, suggesting that the cohort of patients consists of 138  
485 types of cancer, rather than only 4 types (SKCM or THCA; BRAF<sup>WT</sup> or BRAF<sup>V600E</sup>). These 138 types of

486 tumors, each representing a barcode, or a sub-combination of 17 unbalanced processes, are mapped into a  
487 multi-dimensional space, consisting of 17 dimensions. Once the tumor-specific information is  
488 transformed into a multi-dimensional space, treating these thousands of tumors becomes at an arm's  
489 reach. The specific barcode assigned to each patient allows the rational design of patient-tailored  
490 combinations of drugs, many of which already exist in clinics.

491 We found that 353 BRAF<sup>V600E</sup> and BRAF<sup>WT</sup> melanoma tumors are described by 87 distinct barcodes of  
492 unbalanced processes, and that 372 BRAF<sup>V600E</sup> and BRAF<sup>WT</sup> THCA tumors are described by 51 barcodes.  
493 Interestingly, the barcodes appeared to be almost mutually exclusive between SKCM and THCA tumors  
494 (**Table S4**). While this finding suggests that the molecular processes underlying SKCM and THCA tumor  
495 evolution may have organ-specific differences, the large number of cancer type-specific barcodes and the  
496 large number of barcodes describing single patients underscore the need for personalized diagnosis and  
497 treatment.

498 We show that tumors harboring BRAF<sup>V600E</sup> can harbor distinct PaSSSs, and in contrast, that tumors can  
499 harbor the same PaSSS regardless of whether they carry BRAF<sup>V600E</sup> or BRAF<sup>WT</sup>. We therefore deduce  
500 that profiling melanoma patients according to their BRAF mutational status is insufficient to assign  
501 effective therapy to the patient. Since the unbalanced processes each harbor a specific group of co-  
502 expressed altered proteins, they should all be targeted simultaneously to reduce the altered signaling flux  
503 in the tumor.

504 We demonstrate this concept experimentally by analyzing a cell line dataset and predicting efficient  
505 targeted drug combinations for two selected BRAF<sup>V600E</sup> melanoma cell lines, G361 and A375. We show  
506 that although both cell lines contain the mutated BRAF<sup>V600E</sup>, they harbor distinct barcodes, and demand  
507 different combinations of drugs (**Fig. 5, 6**). We demonstrate that in both cell lines, our PaSSS-based  
508 combinations indeed achieved efficient killing of the cells and reached a killing rate that was higher than  
509 that of the drug combination often prescribed clinically to BRAF<sup>V600E</sup> patients, dabrafenib+trametinib .

510 These results were recapitulated in vivo as well (**Fig. 8**). Moreover, we demonstrated the selectivity of the  
511 PaSSS-based drug combinations. The highly efficient PaSSS-based drug combination for one melanoma  
512 malignancy can be significantly less efficient for another melanoma and vice versa.  
513 The results reported here highlight the urgent need for the design of personalized treatments for  
514 melanoma patients based on individualized alterations in signaling networks rather than on initial  
515 mutational events. Furthermore, the study establishes PaSSS analysis as an effective approach for the  
516 design of personalized cocktails comprising FDA-approved drugs. Personalized targeted cocktails, which  
517 may be further combined with immunotherapy strategies, are expected to provide long term efficacy for  
518 melanoma patients.

519

#### 520 **Acknowledgements**

521 The funding sources for this work were from Israel Science Foundation (ISF) and NIH.

522

#### 523 **Availability of data and materials**

524 The human tumor dataset that supports the findings of this study is publicly available for download from  
525 the TCPA portal [14], <https://tcpaportal.org/tcpa/download.html> > Pan-Can 32.

526 The cell line dataset that supports the findings of this study is publicly available for download from the  
527 TCPA portal [14], <https://tcpaportal.org/mclp/#/datasets>

528

#### 529 **Authors' contributions**

530 N.K.B, S.V. and E.F.A designed the research, N.K.B, E.F.A and S.V carried out computational analyses,  
531 E.F.A, S.V, I.A.A, D.V., S.S., and A.A. performed experiments, N.K.B, S.V., and E.F.A wrote the  
532 manuscript. All authors approved the manuscript.

#### 533 **Consent for publication**

534 The authors confirm that this manuscript does not contain any personal data or images from any  
535 individual participants.

### 536 **Competing interests**

537 The authors declare that they have no competing interests.

### 538 **References**

- 539 [1] NIH. [www.cancer.org](http://www.cancer.org) n.d.
- 540 [2] Jenkins RW, Fisher DE. Treatment of Advanced Melanoma in 2020 and Beyond. *J Invest*  
541 *Dermatol* 2020. <https://doi.org/10.1016/J.JID.2020.03.943>.
- 542 [3] Leonardi GC, Falzone L, Salemi R, Zanghi A, Spandidos DA, McCubrey JA, et al. Cutaneous  
543 melanoma: From pathogenesis to therapy (Review). *Int J Oncol* 2018;52:1071.  
544 <https://doi.org/10.3892/IJO.2018.4287>.
- 545 [4] Akbani R, Akdemir KC, Aksoy BA, Albert M, Ally A, Amin SB, et al. Genomic Classification of  
546 Cutaneous Melanoma. *Cell* 2015;161:1681–96. <https://doi.org/10.1016/J.CELL.2015.05.044>.
- 547 [5] C S, L W, S H, GJ H, A P, C R, et al. Reversible and Adaptive Resistance to BRAF(V600E)  
548 Inhibition in Melanoma. *Nature* 2014;508. <https://doi.org/10.1038/NATURE13121>.
- 549 [6] M G, D S, DH J, S M, S C, HJ B, et al. BRAF Inhibitors: Resistance and the Promise of  
550 Combination Treatments for Melanoma. *Oncotarget* 2017;8.  
551 <https://doi.org/10.18632/ONCOTARGET.19836>.
- 552 [7] SA L, SA K. Diverse Mechanisms of BRAF Inhibitor Resistance in Melanoma Identified in  
553 Clinical and Preclinical Studies. *Front Oncol* 2019;9. <https://doi.org/10.3389/FONC.2019.00268>.
- 554 [8] Girotti MR, Pedersen M, Sanchez-Laorden B, Viros A, Turajlic S, Niculescu-Duvaz D, et al.  
555 Inhibiting EGF receptor or SRC family kinase signaling overcomes BRAF inhibitor resistance in  
556 melanoma. *Cancer Discov* 2013;3:158–67. <https://doi.org/10.1158/2159-8290.CD-12-0386>.

- 557 [9] Eroglu Z, Ribas A. Combination therapy with BRAF and MEK inhibitors for melanoma: latest  
558 evidence and place in therapy. *Ther Adv Med Oncol* 2016;8:48–56.  
559 <https://doi.org/10.1177/1758834015616934>.
- 560 [10] Long G V., Stroyakovskiy D, Gogas H, Levchenko E, de Braud F, Larkin J, et al. Combined  
561 BRAF and MEK Inhibition versus BRAF Inhibition Alone in Melanoma. *N Engl J Med*  
562 2014;371:1877–88. <https://doi.org/10.1056/NEJMoa1406037>.
- 563 [11] Vasudevan S, Flashner-Abramson E, Remacle F, Levine RD, Kravchenko-Balasha N.  
564 Personalized disease signatures through information-theoretic compaction of big cancer data. *Proc*  
565 *Natl Acad Sci U S A* 2018;115:7694–9. <https://doi.org/10.1073/pnas.1804214115>.
- 566 [12] Flashner-Abramson E, Vasudevan S, Adejumobi IA, Sonnenblick A, Kravchenko-Balasha N.  
567 Decoding cancer heterogeneity: studying patient-specific signaling signatures towards  
568 personalized cancer therapy. *Theranostics* 2019;9:5149–65. <https://doi.org/10.7150/thno.31657>.
- 569 [13] Flashner-Abramson E, Abramson J, White FM, Kravchenko-Balasha N. A thermodynamic-based  
570 approach for the resolution and prediction of protein network structures. *Chem Phys* 2018;514:20–  
571 30. <https://doi.org/10.1016/j.chemphys.2018.03.005>.
- 572 [14] The Cancer Proteome Atlas Portal n.d. <http://tcpaportal.org>.
- 573 [15] Li J, Zhao W, Akbani R, Liu W, Ju Z, Ling S, et al. Characterization of Human Cancer Cell Lines  
574 by Reverse-phase Protein Arrays. *Cancer Cell* 2017;31:225–39.  
575 <https://doi.org/10.1016/j.ccell.2017.01.005>.
- 576 [16] Levine RD, Bernstein RB. Energy disposal and energy consumption in elementary chemical  
577 reactions. Information theoretic approach. *Acc Chem Res* 1974;7:393–400.  
578 <https://doi.org/10.1021/ar50084a001>.
- 579 [17] Levine RD. An information theoretical approach to inversion problems. *J Phys A Math Gen*  
580 1980;13:91. <https://doi.org/10.1088/0305-4470/13/1/011>.
- 581 [18] Levine RD. *Molecular Reaction Dynamics*. Cambridge: The University Press; 2005.

- 582 [19] McMillan WG, Mayer JE. THE STATISTICAL THERMODYNAMICS OF  
583 MULTICOMPONENT SYSTEMS. *J Chem Phys* 1945;13:276–305.  
584 <https://doi.org/10.1063/1.1724036>.
- 585 [20] Mayer JE, Mayer MG. *Statistical mechanics*. 2nd ed. New York: Wiley; 1977.
- 586 [21] McQuarrie DA. *Statistical Mechanics*, 1st ed. Univ Sci Books 2000.  
587 <http://www.uscibooks.com/mcqstatm.htm> (accessed December 10, 2015).
- 588 [22] Remacle F, Kravchenko-Balasha N, Levitzki A, Levine RD. Information-theoretic analysis of  
589 phenotype changes in early stages of carcinogenesis. *Proc Natl Acad Sci U S A* 2010;107:10324–  
590 9. <https://doi.org/10.1073/pnas.1005283107>.
- 591 [23] Gross A, Levine RD. Surprisal analysis of transcripts expression levels in the presence of noise: a  
592 reliable determination of the onset of a tumor phenotype. *PLoS One* 2013;8:e61554.  
593 <https://doi.org/10.1371/journal.pone.0061554>.
- 594 [24] Schadendorf D, van Akkooi ACJ, Berking C, Griewank KG, Gutzmer R, Hauschild A, et al.  
595 Melanoma. *Lancet* 2018;392:971–84. [https://doi.org/10.1016/S0140-6736\(18\)31559-9](https://doi.org/10.1016/S0140-6736(18)31559-9).
- 596 [25] Chapman PB, Hauschild A, Robert C, Haanen JB, Ascierto P, Larkin J, et al. Improved Survival  
597 with Vemurafenib in Melanoma with BRAF V600E Mutation. *N Engl J Med* 2011;364:2507–16.  
598 <https://doi.org/10.1056/NEJMoa1103782>.
- 599 [26] Hauschild A, Grob J-J, Demidov L V, Jouary T, Gutzmer R, Millward M, et al. Dabrafenib in  
600 BRAF-mutated metastatic melanoma: a multicentre, open-label, phase 3 randomised controlled  
601 trial. *Lancet (London, England)* 2012;380:358–65. [https://doi.org/10.1016/S0140-6736\(12\)60868-](https://doi.org/10.1016/S0140-6736(12)60868-X)  
602 X.
- 603 [27] Luke JJ, Flaherty KT, Ribas A, Long G V. Targeted agents and immunotherapies: optimizing  
604 outcomes in melanoma. *Nat Rev Clin Oncol* 2017;14:463–82.  
605 <https://doi.org/10.1038/nrclinonc.2017.43>.
- 606 [28] Kari S, Vasko V V, Priya S, Kirschner LS. PKA Activates AMPK Through LKB1 Signaling in



- 607 Follicular Thyroid Cancer. *Front Endocrinol (Lausanne)* 2019;10:769.  
608 <https://doi.org/10.3389/fendo.2019.00769>.
- 609 [29] Xia S, Wang C, Postma EL, Yang Y, Ni X, Zhan W. Fibronectin 1 promotes migration and  
610 invasion of papillary thyroid cancer and predicts papillary thyroid cancer lymph node metastasis.  
611 *Onco Targets Ther* 2017;10:1743–55. <https://doi.org/10.2147/OTT.S122009>.
- 612 [30] Sponziello M, Rosignolo F, Celano M, Maggisano V, Pecce V, De Rose RF, et al. Fibronectin-1  
613 expression is increased in aggressive thyroid cancer and favors the migration and invasion of  
614 cancer cells. *Mol Cell Endocrinol* 2016;431:123–32. <https://doi.org/10.1016/j.mce.2016.05.007>.
- 615 [31] Mitsiades CS, Hayden P, Kotoula V, McMillin DW, McMullan C, Negri J, et al. Bcl-2  
616 Overexpression in Thyroid Carcinoma Cells Increases Sensitivity to Bcl-2 Homology 3 Domain  
617 Inhibition. *J Clin Endocrinol Metab* 2007;92:4845–52. <https://doi.org/10.1210/jc.2007-0942>.
- 618 [32] Süren D, Yildirim M, Sayiner A, Alikanoğlu AS, Atalay I, Gündüz UR, et al. Expression of  
619 claudin 1, 4 and 7 in thyroid neoplasms. *Oncol Lett* 2017;13:3722–6.  
620 <https://doi.org/10.3892/ol.2017.5916>.
- 621 [33] Mirmohammadsadegh A, Hassan M, Bardenheuer W, Marini A, Gustrau A, Nambiar S, et al.  
622 STAT5 phosphorylation in malignant melanoma is important for survival and is mediated through  
623 SRC and JAK1 kinases. *J Invest Dermatol* 2006;126:2272–80.  
624 <https://doi.org/10.1038/sj.jid.5700385>.
- 625 [34] Davies MA. The Role of the PI3K-AKT Pathway in Melanoma. *Cancer J* 2012;18:142–7.  
626 <https://doi.org/10.1097/PPO.0b013e31824d448c>.
- 627 [35] Carvajal RD, Antonescu CR, Wolchok JD, Chapman PB, Roman R-A, Teitcher J, et al. KIT as a  
628 Therapeutic Target in Metastatic Melanoma. *JAMA* 2011;305:2327.  
629 <https://doi.org/10.1001/jama.2011.746>.
- 630 [36] Reschke M, Mihic-Probst D, van der Horst EH, Knyazev P, Wild PJ, Hutterer M, et al. HER3 Is a  
631 Determinant for Poor Prognosis in Melanoma. *Clin Cancer Res* 2008;14:5188–97.

- 632 <https://doi.org/10.1158/1078-0432.CCR-08-0186>.
- 633 [37] Ivanov VN, Zhou H, Partridge MA, Hei TK. Inhibition of Ataxia Telangiectasia Mutated Kinase  
634 Activity Enhances TRAIL-Mediated Apoptosis in Human Melanoma Cells. *Cancer Res*  
635 2009;69:3510–9. <https://doi.org/10.1158/0008-5472.CAN-08-3883>.
- 636 [38] Andrikopoulos P, Kieswich J, Pacheco S, Nadarajah L, Harwood SM, O’Riordan CE, et al. The  
637 MEK Inhibitor Trametinib Ameliorates Kidney Fibrosis by Suppressing ERK1/2 and mTORC1  
638 Signaling. *J Am Soc Nephrol* 2019;30:33–49. <https://doi.org/10.1681/ASN.2018020209>.
- 639 [39] Verduzco D, Kuenzi BM, Kinose F, Sondak VK, Eroglu Z, Rix U, et al. Ceritinib Enhances the  
640 Efficacy of Trametinib in BRAF/NRAS-Wild-Type Melanoma Cell Lines. *Mol Cancer Ther*  
641 2018;17:73–83. <https://doi.org/10.1158/1535-7163.MCT-17-0196>.
- 642 [40] Robin X, Creixell P, Radetskaya O, Santini CC, Longden J, Linding R. Personalized network-  
643 based treatments in oncology. *Clin Pharmacol Ther* 2013;94:646–50.  
644 <https://doi.org/10.1038/clpt.2013.171>.
- 645 [41] Fisher R, Puzstai L, Swanton C. Cancer heterogeneity: implications for targeted therapeutics. *Br J*  
646 *Cancer* 2013;108:479–85. <https://doi.org/10.1038/bjc.2012.581>.
- 647 [42] Hinohara K, Polyak K. Intratumoral Heterogeneity: More Than Just Mutations. *Trends Cell Biol*  
648 2019;29:569–79. <https://doi.org/10.1016/j.tcb.2019.03.003>.
- 649 [43] Alizadeh AA, Aranda V, Bardelli A, Blanpain C, Bock C, Borowski C, et al. Toward  
650 understanding and exploiting tumor heterogeneity. *Nat Med* 2015;21:846–53.  
651 <https://doi.org/10.1038/nm.3915>.
- 652 [44] Su Y, Ko ME, Cheng H, Zhu R, Xue M, Wang J, et al. Multi-omic single-cell snapshots reveal  
653 multiple independent trajectories to drug tolerance in a melanoma cell line. *Nat Commun*  
654 2020;11:2345. <https://doi.org/10.1038/s41467-020-15956-9>.
- 655
